# Supplementary material for: Transcriptome analysis identifies Bacillus anthracis genes that respond to CO2 through an AtxA-dependent mechanism
Source: PubMed Central journal article supplement (PMC3987803; doi:10.1186/1471-2164-15-229), 2014-03-25
Supplement: 1471-2164-15-229-S1.pdf [file 1471-2164-15-229-S1.pdf]

## Supplementary Tables and Figures

### Supplementary Table 1

Plasmids, strains, and primers used in this study.

| <b>Plasmids</b>         | <b>Relevant Characteristics</b>                                                          | <b>Reference</b> |
|-------------------------|------------------------------------------------------------------------------------------|------------------|
| pSC                     | Temperature-sensitive vector to insert homologous DNA                                    | [1]              |
| pCrePAS                 | Temperature-sensitive vector expressing Cre recombinase                                  | [1]              |
| pSC-AtxA-L              | From pSC, with DNA fragment upstream of the AtxA ORF inserted into XhoI and SpeI sites   | This work        |
| pSC-AtxA-R              | From pSC, with DNA fragment downstream of the AtxA ORF inserted into XhoI and SpeI sites | This work        |
| pIU68                   | AtxA complement vector                                                                   | [2]              |
|                         |                                                                                          |                  |
| <b>Strains</b>          | <b>Relevant Characteristics</b>                                                          |                  |
| Ames 35                 | <i>B. anthracis</i> Ames pXO1+ pXO2- ANR-1 strain                                        | [3], [4]*        |
| Ames 35 ΔAtxA           | Ames 35 with <i>loxP</i> site replacing <i>atxA</i> ORF                                  | This work        |
| Ames 35 ΔAtxA pIU68     | Ames 35 ΔAtxA transformed with pIU68                                                     | This work        |
|                         |                                                                                          |                  |
| <b>Oligonucleotides</b> | <b>Sequence</b>                                                                          |                  |
| AtxA LF                 | CCTCGAGACCAAAAATTTCAAGGTGAT                                                              |                  |
| AtxA LR                 | AACTAGTCGGTGTAGCATGTCTATAATTGA                                                           |                  |
| AtxA RF                 | CCTCGAGAAAAGATAATATAAATGCC                                                               |                  |
| AtxA RR                 | AACTAGTAGTGGTACGACGATTCCAA                                                               |                  |
| AtxA Int RF             | AAAGAGGAAAAGGAGAGATT                                                                     |                  |
| AtxA Int RR             | CCCATGAGAATACTTTTCAA                                                                     |                  |
| AtxA Fin F              | ACATAAGTATCGTTTTGTTGCTTCC                                                                |                  |
| AtxA Fin R              | CCAAGTAAATAAGAAACCGCCAAAT                                                                |                  |

\* The Ames 35 strain designation is our lab's name for Ames cured of pXO2 and retaining pXO1. This strain is equivalent (and may be identical) to the strain ANR-1 that is mentioned in the text (but not the strain table) of Green et al. [3]. The equivalence of Ames 35 to ANR-1 was stated in the strain table of Pomerantsev et al. [4].

### Reference List

- [1] Pomerantsev AP, Camp A, Leppla SH: A new minimal replicon of *Bacillus anthracis* plasmid pXO1. *J Bacteriol* 6-5-2009;191:5134-5146.
- [2] Uchida I, Hornung JM, Thorne CB, Klimpel KR, Leppla SH: Cloning and characterization of a gene whose product is a trans-activator of anthrax toxin synthesis. *J Bacteriol* 1993;175:5329-5338.
- [3] Green BD, Battisti L, Koehler TM, Thorne CB, Ivins BE: Demonstration of a capsule plasmid in *Bacillus anthracis*. *Infect Immun* 1985;49:291-297.
- [4] Pomerantsev AP, Sitaraman R, Galloway CR, Kivovich V, Leppla SH: Genome engineering in *Bacillus anthracis* using Cre recombinase. *Infect Immun* 2006;74:682-693.

Supplementary Table 2.  
Primers and probes used for qPCR

| Gene (NCBI ID)                                                 |                | Primer/Probe Sequences                                       |
|----------------------------------------------------------------|----------------|--------------------------------------------------------------|
| <i>Aspartokinase</i><br>(GBAA3936)                             | Forward primer | 5' GTGCCGCTTCGTGTACGTT 3'                                    |
|                                                                | Reverse primer | 5' AATACCTGTAACCGGACGTTCTTC 3'                               |
|                                                                | Probe          | 5' CAL Fluor Gold 540 ATCCTGCCCTTTCGTAGCACCATCGTA<br>BHQ1 3' |
| <i>Germination protein</i><br><i>gerN</i> (GBAA1639)           | Forward primer | 5' CCATTCGTAGGTGGTTACGTTTC 3'                                |
|                                                                | Reverse primer | 5' ACACTTGTGCGACATAGAAGTAATCCT 3'                            |
|                                                                | Probe          | 5' FAM ACAGCATTTCCTTGTTCATTCCCATAACA BHQ1 3'                 |
| <i>S-layer protein</i><br>(GBAA_pXO1_0124)                     | Forward primer | 5' AATAGTTCAGATCAAATGGTCCC 3'                                |
|                                                                | Reverse primer | 5' TCCCTTGTGACTGAATCACCTAATC 3'                              |
|                                                                | Probe          | 5' FAM TTCTGGACGTTCCATCAAATCATTGGG BHQ1 3'                   |
| <i>S-layer protein EA1</i><br>(GBAA0887)                       | Forward primer | 5' GTACTGGTGGTAAATGGGAGCC 3'                                 |
|                                                                | Reverse primer | 5' GAAACTTTCACATCAGTTACATACGCT 3'                            |
|                                                                | Probe          | 5' FAM CGTGCAGAAGCAGCTCAATTTATCGCAT BHQ1 3'                  |
| <i>Universal stress</i><br><i>protein family</i><br>(GBAA4875) | Forward primer | 5' AATTATGTGTGGTGCAACTGGTTT 3'                               |
|                                                                | Reverse primer | 5' GAACAACAAGGACATCGCATTTC 3'                                |
|                                                                | Probe          | 5' FAM CGCTACCAATTAGGAAACGCTCAACAGCAT BHQ1 3'                |
| <i>Unknown sRNA</i><br>(sRNA-1)                                | Forward primer | 5' AGACTACATACAGCTATCGATTGGAAATT 3'                          |
|                                                                | Reverse primer | 5' TTTACCTCTGTTAAGTCCAGTATCTATTCTATTC 3'                     |
|                                                                | Probe          | 5' FAM CATTCCCATTTTTATTGTGTCCCATCAGCCT BQH1 3'               |
| <i>Unknown putative</i><br><i>transporter</i><br>(GBAA2840)    | Forward primer | 5' AATTCTCAAAAACGACTCCAGATTC 3'                              |
|                                                                | Reverse primer | 5' ACCACCAAGACCACCTAGTAATAAACC 3'                            |
|                                                                | Probe          | 5' FAM AAAACGAAAGCAACAAACACAGCACCAAAA BHQ1 3'                |
| <i>Unknown sRNA</i><br>(sRNA-2)                                | Forward primer | 5' AGTTC AAGAGTTACTGAAACTAGCCATT3'                           |
|                                                                | Reverse primer | 5' AGAACCAAATTGAATCACGTTATAATTC 3'                           |
|                                                                | Probe          | 5' FAM TCCTAATATGGAGAAAAGATGGCTATCGCTTCTCACCT<br>BHQ1 -3'    |

Supplementary Table 3.

Genes having increased expression in conditions of  $\Delta$ AtxA and air (total =17)

| Locus Tag | Protein Product (NCBI) | Protein Annotation                                          | P-Value | Fold-Change |
|-----------|------------------------|-------------------------------------------------------------|---------|-------------|
| GBAA0631  | YP_017259.1            | PTS system, trehalose-specific IIBC component (EC 2.7.1.69) | <0.0001 | 241.4       |
| GBAA0730  | YP_017363.1            | Glycine oxidase (EC 1.4.3.19)                               | 0.0076  | 4.1         |
| GBAA0733  | YP_017366.1            | Molybdopterin biosynthesis MoeB protein                     | 0.0007  | 4.0         |
| GBAA1158  | YP_017774.1            | Ferrochelatase (EC 4.99.1.1)                                | 0.0006  | 72.9        |
| GBAA2125  | YP_018768.1            | Respiratory nitrate reductase alpha chain (EC 1.7.99.4)     | <0.0001 | 8.4         |
| GBAA2126  | YP_018769.1            | Respiratory nitrate reductase beta chain (EC 1.7.99.4)      | <0.0001 | 9.2         |
| GBAA2127  | YP_018770.1            | Respiratory nitrate reductase delta chain (EC 1.7.99.4)     | <0.0001 | 8.2         |
| GBAA2128  | YP_018771.1            | Respiratory nitrate reductase gamma chain (EC 1.7.99.4)     | 0.0093  | 7.8         |
| GBAA2134  | YP_018777.1            | Molybdopterin biosynthesis MoeB protein                     | <0.0001 | 8.6         |
| GBAA2135  | YP_018778.1            | Molybdopterin biosynthesis MoeA protein                     | <0.0001 | 7.0         |
| GBAA2136  | YP_018779.1            | Molybdopterin converting factor, large subunit              | <0.0001 | 9.3         |
| GBAA2137  | YP_018780.1            | Molybdopterin converting factor, small subunit              | 0.0011  | 12.0        |
| GBAA2138  | YP_018781.1            | Nitrite extrusion protein                                   | <0.0001 | 7.0         |
| GBAA2367  | YP_019011.1            | Oxalate/formate antiporter                                  | <0.0001 | 11.4        |
| GBAA3317  | YP_019951.2            | Amino acid permease                                         | 0.0025  | 12.2        |
| GBAA3497  | YP_020132.1            | Hydroxylamine reductase (EC 1.7.99.1)                       | <0.0001 | 6.2         |
| GBAA5273  | YP_021930.1            | Hypothetical protein                                        | <0.0001 | 4.1         |

This table reports genes with a significant interaction ( $p < 0.01$ ) between genotype and environment as well as increased expression in the  $\Delta$ AtxA/air condition compared to the WT/CO<sub>2</sub> condition (fold-change > 4).

Supplementary Table 4.

Genes having increased expression in conditions of  $\Delta$ AtxA and CO<sub>2</sub> (total = 1)

| Locus Tag | Protein Product (NCBI) | Protein Annotation                 | P-Value | Fold-Change |
|-----------|------------------------|------------------------------------|---------|-------------|
| GBAA1946  | YP_018590.1            | Transport ATP-binding protein cydC | 0.0044  | 20.2        |

This table reports genes with a significant interaction ( $p < 0.01$ ) between genotype and environment as well as increased expression in the  $\Delta$ AtxA/CO<sub>2</sub> condition compared to the WT/air condition (fold-change > 4).

Supplementary Table 5.

Genes having increased expression in conditions of wildtype and air (total = 23)

| Locus Tag      | Protein Product (NCBI) | Protein Annotation                                                                                | P-Value | Fold-Change |
|----------------|------------------------|---------------------------------------------------------------------------------------------------|---------|-------------|
| GBAA_pXO1_0124 | YP_016455.2            | S-layer protein                                                                                   | <0.0001 | 16.3        |
| GBAA_pXO1_0125 | YP_016456.2            | Phosphatidylglycerophosphatase B (EC 3.1.3.27)                                                    | <0.0001 | 4.0         |
| GBAA_pXO1_0151 | YP_016482.2            | Hypothetical protein                                                                              | <0.0001 | Inf         |
| GBAA_pXO1_0153 | YP_016484.2            | Hypothetical protein                                                                              | <0.0001 | Inf         |
| sRNA-1         |                        | sRNA-1                                                                                            | <0.0001 | 33.6        |
| sRNA-2         |                        | sRNA-2                                                                                            | <0.0001 | 26.8        |
| GBAA1158       | YP_017774.1            | Ferrochelatase (EC 4.99.1.1)                                                                      | 0.0006  | 14.4        |
| GBAA2125       | YP_018768.1            | Respiratory nitrate reductase alpha chain (EC 1.7.99.4)                                           | <0.0001 | 11.6        |
| GBAA2126       | YP_018769.1            | Respiratory nitrate reductase beta chain (EC 1.7.99.4)                                            | <0.0001 | 11.8        |
| GBAA2127       | YP_018770.1            | Respiratory nitrate reductase delta chain (EC 1.7.99.4)                                           | <0.0001 | 12.9        |
| GBAA2128       | YP_018771.1            | Respiratory nitrate reductase gamma chain (EC 1.7.99.4)                                           | 0.0093  | 15.5        |
| GBAA2134       | YP_018777.1            | Molybdopterin biosynthesis MoeB protein                                                           | <0.0001 | 13.6        |
| GBAA2135       | YP_018778.1            | Molybdopterin biosynthesis MoeA protein                                                           | <0.0001 | 10.2        |
| GBAA2136       | YP_018779.1            | Molybdopterin converting factor, large subunit                                                    | <0.0001 | 11.0        |
| GBAA2137       | YP_018780.1            | Molybdopterin converting factor, small subunit                                                    | 0.0011  | 13.5        |
| GBAA2138       | YP_018781.1            | Nitrite extrusion protein                                                                         | <0.0001 | 11.5        |
| GBAA2143       | YP_018786.1            | Sirohydrochlorin cobaltochelatase (EC 4.99.1.3)                                                   | <0.0001 | 4.4         |
| GBAA2144       | YP_018787.1            | Uroporphyrin-III C-methyltransferase (EC 2.1.1.107) / Uroporphyrinogen-III synthase (EC 4.2.1.75) | <0.0001 | 4.1         |
| GBAA2145       | YP_018788.1            | Nitrite reductase [NAD(P)H] small subunit (EC 1.7.1.4)                                            | 0.0017  | 4.5         |
| GBAA2146       | YP_018789.1            | Nitrite reductase [NAD(P)H] large subunit (EC 1.7.1.4)                                            | 0.0023  | 4.3         |
| GBAA2367       | YP_019011.1            | Oxalate/formate antiporter                                                                        | <0.0001 | 19.9        |
| GBAA3497       | YP_020132.1            | Hydroxylamine reductase (EC 1.7.99.1)                                                             | <0.0001 | 16.5        |
| GBAA3560       | YP_020193.1            | Glycerophosphoryl diester phosphodiesterase (EC 3.1.4.46)                                         | 0.0029  | 7.3         |

This table reports genes with a significant interaction ( $p < 0.01$ ) between genotype and environment as well as increased expression in the WT/air condition compared to the  $\Delta$ AtxA/ $\text{CO}_2$  condition (fold-change  $> 4$ ).

Supplementary Table 6.

Genes having increased expression in wildtype genotypes (total = 95)

| Locus Tag      | Protein Product (NCBI) | Protein Annotation                                        | P-Value | Fold-Change |
|----------------|------------------------|-----------------------------------------------------------|---------|-------------|
| GBAA_pXO1_0123 | YP_016454.2            | Hypothetical protein                                      | <0.0001 | 42.0        |
| GBAA_pXO1_0124 | YP_016455.2            | S-layer protein                                           | <0.0001 | 123.1       |
| GBAA_pXO1_0125 | YP_016456.2            | Phosphatidylglycerophosphatase B (EC 3.1.3.27)            | <0.0001 | 22.7        |
| GBAA_pXO1_0137 | YP_016468.2            | Hypothetical protein                                      | <0.0001 | 22.7        |
| GBAA_pXO1_0145 | YP_016476.2            | Putative integral membrane protein                        | <0.0001 | 4.3         |
| GBAA_pXO1_0146 | YP_016477.2            | Anthrax toxins expression trans-acting positive regulator | <0.0001 | 110.5       |
| GBAA_pXO1_0151 | YP_016482.2            | Hypothetical protein                                      | <0.0001 | 143.9       |
| GBAA_pXO1_0152 | YP_016483.2            | Hypothetical protein                                      | <0.0001 | 192.8       |
| GBAA_pXO1_0153 | YP_016484.2            | Hypothetical protein                                      | <0.0001 | 71.9        |
| GBAA_pXO1_0164 | YP_016495.2            | Protective surface antigen                                | <0.0001 | 72.2        |
| GBAA_pXO1_0165 | YP_016496.2            | Hypothetical protein                                      | <0.0001 | 45.1        |
| GBAA_pXO1_0166 | YP_016497.2            | Transcriptional repressor pagR                            | <0.0001 | 58.0        |
| GBAA_pXO1_0171 | YP_016502.2            | Ribonuclease domain protein                               | 0.0004  | 8.9         |
| GBAA_pXO1_0172 | YP_016503.2            | Lethal factor precursor (EC 3.4.24.-)                     | <0.0001 | 9.5         |
| GBAA_pXO1_0205 | YP_022466.1            | Response regulator aspartate phosphatase                  | 0.0024  | 3.1         |
| sRNA-1         |                        | sRNA-1                                                    | 0.0009  | 315.4       |
| sRNA-2         |                        | sRNA-2                                                    | 0.0004  | 308.0       |
| GBAA0170       | YP_016777.1            | Hypothetical protein                                      | 0.0002  | 3.1         |
| GBAA0171       | YP_016779.1            | Hypothetical Protein                                      | 0.0001  | 3.0         |
| GBAA0238       | YP_016844.1            | Hypothetical Protein                                      | 0.0079  | 2.6         |
| GBAA0361       | YP_016980.1            | Polyketide cyclase family protein                         | 0.0053  | 2.5         |
| GBAA0553       | YP_017175.1            | Acetyltransferase (EC 2.3.1.-)                            | <0.0001 | 3.9         |
| GBAA0793       | YP_017427.1            | PTS system, diacetylchitobiose-specific IIC component     | 0.0003  | 6.3         |
| GBAA0795       | YP_052611.1            | outer surface protein                                     | 0.0027  | 5.5         |
| GBAA0864       | YP_017501.1            | Hypothetical protein                                      | 0.0085  | 3.0         |
| GBAA0887       | YP_017522.1            | S-layer protein EA1 precursor                             | <0.0001 | 5.8         |
| GBAA0918       | YP_017555.1            | Hypothetical protein                                      | 0.0001  | 4.5         |
| GBAA0936       | YP_017571.1            | Hypothetical membrane associated protein                  | 0.0003  | 7.0         |
| GBAA0956       | YP_017588.1            | Hypothetical protein                                      | 0.0056  | 3.1         |
| GBAA1061       | YP_017686.1            | Hypothetical protein                                      | 0.0098  | 2.4         |
| GBAA1127       | YP_017747.1            | S-layer homology domain                                   | <0.0001 | 3.9         |
| GBAA1363       | YP_017982.1            | Hypothetical protein                                      | <0.0001 | 7.0         |
| GBAA1378       | YP_018000.1            | CAAX amino terminal protease family                       | 0.0096  | 2.3         |
| GBAA1480       | YP_018102.1            | Hypothetical protein                                      | <0.0001 | 3.2         |
| GBAA1579       | YP_018202.1            | Hypothetical protein                                      | <0.0001 | 5.4         |

|          |             |                                                                  |         |     |
|----------|-------------|------------------------------------------------------------------|---------|-----|
| GBAA1816 | YP_018453.1 | Phosphohydrolase (MutT/nudix family protein)                     | 0.0079  | 2.5 |
| GBAA2000 | YP_018647.1 | Transition state regulator                                       | <0.0001 | 3.6 |
| GBAA2301 | YP_018949.1 | Hypothetical cytosolic protein                                   | 0.0063  | 2.6 |
| GBAA2411 | YP_019053.1 | Acetyltransferase (EC 2.3.1.-)                                   | 0.0003  | 3.6 |
| GBAA2467 | YP_019106.2 | Hypothetical membrane spanning protein                           | 0.0015  | 2.7 |
| GBAA2485 | YP_019124.1 | Methyltransferase (EC 2.1.1.-)                                   | 0.0009  | 2.5 |
| GBAA2527 | YP_019165.1 | Hypothetical protein                                             | 0.0009  | 4.0 |
| GBAA2534 | YP_019173.1 | Ribosomal-protein-serine acetyltransferase (EC 2.3.1.-)          | 0.0003  | 2.8 |
| GBAA2547 | YP_019185.1 | Acyl-CoA dehydrogenase, short-chain specific (EC 1.3.99.2)       | <0.0001 | 4.0 |
| GBAA2548 | YP_019186.1 | Propionyl-CoA carboxylase biotin-containing subunit (EC 6.4.1.3) | 0.0007  | 3.1 |
| GBAA2550 | YP_019188.1 | Hydroxymethylglutaryl-CoA lyase (EC 4.1.3.4)                     | 0.0028  | 3.0 |
| GBAA2552 | YP_019190.1 | Propionyl-CoA carboxylase beta chain (EC 6.4.1.3)                | 0.0085  | 2.7 |
| GBAA2673 | YP_019314.1 | Chitosanase (EC 3.2.1.132)                                       | 0.0085  | 2.6 |
| GBAA2781 | YP_019423.1 | Phosphohydrolase (MutT/nudix family protein)                     | 0.0002  | 4.1 |
| GBAA2783 | YP_019425.2 | Hypothetical protein                                             | 0.0001  | 3.6 |
| GBAA2816 | YP_052628.1 | N-METHYL-TRANSFERASE                                             | 0.0035  | 2.7 |
| GBAA2956 | YP_019600.1 | Chorismate synthase (EC 4.2.3.5)                                 | 0.0074  | 2.7 |
| GBAA3011 | YP_019655.1 | Glyoxalase family protein                                        | 0.004   | 2.9 |
| GBAA3043 | YP_019684.1 | Hypothetical protein                                             | 0.0041  | 4.7 |
| GBAA3046 | YP_019687.1 | Hypothetical Membrane Spanning Protein                           | 0.0027  | 2.8 |
| GBAA3047 | YP_019688.1 | ABC transporter permease protein                                 | 0.0003  | 3.3 |
| GBAA3200 | YP_019841.2 | Hypothetical protein                                             | 0.0068  | 2.5 |
| GBAA3227 | YP_019866.1 | Hypothetical Protein                                             | <0.0001 | 7.6 |
| GBAA3283 | YP_019919.1 | Transcriptional regulator, LacI family                           | 0.0033  | 3.1 |
| GBAA3411 | YP_020046.1 | Integral membrane protein                                        | 0.0055  | 2.5 |
| GBAA3498 | YP_020133.1 | Hypothetical protein                                             | 0.0049  | 2.6 |
| GBAA3504 | YP_020138.1 | LSU ribosomal protein L12P (L7/L12)                              | 0.0003  | 2.9 |
| GBAA3519 | YP_020154.1 | Hypothetical protein                                             | <0.0001 | 5.4 |
| GBAA3529 | YP_020163.1 | Hypothetical protein                                             | <0.0001 | 3.2 |
| GBAA3560 | YP_020193.1 | Glycerophosphoryl diester phosphodiesterase (EC 3.1.4.46)        | <0.0001 | 5.2 |
| GBAA3683 | YP_020316.1 | Hypothetical protein                                             | 0.0002  | 3.2 |
| GBAA3691 | YP_020324.1 | Hypothetical protein                                             | 0.0002  | 3.1 |
| GBAA3692 | YP_020325.1 | Hypothetical Protein                                             | <0.0001 | 3.3 |
| GBAA3694 | YP_020327.1 | Hypothetical protein                                             | 0.0002  | 9.9 |
| GBAA3804 | YP_020437.1 | Hypothetical protein                                             | 0.0015  | 3.2 |
| GBAA3860 | YP_020498.1 | Copper chaperone copZ                                            | 0.0034  | 3.0 |
| GBAA3874 | YP_020514.1 | Hypothetical protein                                             | 0.0002  | 2.9 |

|          |             |                                                  |         |     |
|----------|-------------|--------------------------------------------------|---------|-----|
| GBAA4065 | YP_020708.1 | Hypothetical protein                             | 0.0007  | 3.2 |
| GBAA4211 | YP_020853.1 | Lipoprotein                                      | 0.0002  | 2.9 |
| GBAA4242 | YP_020884.1 | Hypothetical protein                             | <0.0001 | 3.6 |
| GBAA4345 | YP_020990.1 | Tyrosine transporter                             | 0.0033  | 2.6 |
| GBAA4420 | YP_022691.1 | Hypothetical protein                             | 0.0056  | 3.2 |
| GBAA4581 | YP_021226.1 | Hypothetical protein                             | 0.0007  | 3.0 |
| GBAA4582 | YP_021227.1 | Hypothetical protein                             | <0.0001 | 3.6 |
| GBAA4739 | YP_021387.1 | Stress-responsive transcriptional regulator PspC | 0.0082  | 3.3 |
| GBAA4927 | YP_021570.1 | Hypothetical protein                             | <0.0001 | 3.0 |
| GBAA4928 | YP_021571.1 | Hypothetical protein                             | <0.0001 | 3.4 |
| GBAA4934 | YP_021579.1 | Hypothetical protein                             | 0.0082  | 2.5 |
| GBAA4941 | YP_021587.1 | Hypothetical protein                             | 0.0063  | 3.4 |
| GBAA5015 | YP_021667.1 | Hypothetical membrane spanning protein           | 0.0011  | 3.0 |
| GBAA5018 | YP_022711.1 | Hypothetical protein                             | 0.0016  | 2.7 |
| GBAA5020 | YP_022712.1 | Hypothetical protein                             | 0.0006  | 2.9 |
| GBAA5045 | YP_021693.1 | Hypothetical protein                             | <0.0001 | 3.9 |
| GBAA5072 | YP_021721.1 | Hypothetical protein                             | 0.0012  | 3.1 |
| GBAA5183 | YP_021838.1 | CAAX amino terminal protease family              | 0.0025  | 3.3 |
| GBAA5187 | YP_021842.1 | Hypothetical protein                             | 0.0056  | 2.4 |
| GBAA5202 | YP_021858.1 | Hypothetical protein                             | 0.0001  | 3.6 |
| GBAA5203 | YP_021859.1 | Phosphoglycerate mutase family protein           | 0.0076  | 2.5 |
| GBAA5258 | YP_021914.2 | Collagen adhesion protein                        | 0.0034  | 2.6 |
| GBAA5351 | YP_022009.1 | Phage protein                                    | 0.0076  | 2.5 |

This table reports genes with a significant difference in expression ( $p < 0.01$ ) between genotypes, as well as increased expression in the WT strain as compared to the  $\Delta$ AtxA mutants strain (fold-change  $> 2$ ).

Supplementary Table 7.

Genes having increased expression in  $\Delta$ AtxA genotypes (total = 44).

| Locus Tag | Protein Product (NCBI) | Protein Annotation                                                                                                | P-Value | Fold-Change |
|-----------|------------------------|-------------------------------------------------------------------------------------------------------------------|---------|-------------|
| GBAA0040  | YP_016644.1            | Sporulation-specific protease YabG                                                                                | 0.0024  | 2.4         |
| GBAA0344  | YP_016960.1            | Peroxiredoxin reductase (NAD(P)H) (EC 1.8.1.-) / NADH oxidase H <sub>2</sub> O <sub>2</sub> -forming (EC 1.6.3.-) | 0.0009  | 2.5         |
| GBAA0349  | YP_016965.1            | Ferrichrome transport system permease protein fhuG                                                                | 0.0028  | 2.3         |
| GBAA0350  | YP_016966.1            | Ferrichrome transport system permease protein fhuB                                                                | 0.0063  | 2.3         |
| GBAA0383  | YP_017003.1            | Hydroxymethylpyrimidine transport ATP-binding protein                                                             | 0.0066  | 2.6         |
| GBAA0495  | YP_017114.1            | Integral membrane protein                                                                                         | 0.0002  | 3.5         |
| GBAA0534  | YP_017153.1            | ABC transporter permease protein                                                                                  | 0.0008  | 2.6         |
| GBAA0615  | YP_017241.1            | Fe <sup>3+</sup> -siderophore binding protein                                                                     | <0.0001 | 3.4         |
| GBAA0617  | YP_017244.1            | Fe <sup>3+</sup> -siderophore transport system permease protein                                                   | 0.0012  | 2.5         |
| GBAA0631  | YP_017259.1            | PTS system, trehalose-specific IIBC component (EC 2.7.1.69)                                                       | <0.0001 | 103.8       |
| GBAA0745  | YP_017377.1            | Phospholipase (EC 3.1.-.-)                                                                                        | 0.004   | 2.7         |
| GBAA0802  | YP_017440.1            | Branched-chain amino acid transport system carrier protein                                                        | 0.0004  | 3.9         |
| GBAA0829  | YP_017467.1            | Transporter, Drug/Metabolite Exporter family                                                                      | 0.0018  | 5.5         |
| GBAA0845  | YP_017484.1            | Amino acid permease                                                                                               | 0.0085  | 2.6         |
| GBAA0981  | YP_017610.1            | S-layer protein / Peptidoglycan endo-beta-N-acetylglucosaminidase (EC 3.2.1.-)                                    | 0.0015  | 2.3         |
| GBAA1088  | YP_017711.1            | Metal-dependent hydrolase (EC 3.-.-.-)                                                                            | 0.0045  | 2.3         |
| GBAA1452  | YP_018076.2            | Na <sup>+</sup> /H <sup>+</sup> antiporter nhaC                                                                   | 0.0001  | 2.8         |
| GBAA1943  | YP_018587.1            | Cytochrome d ubiquinol oxidase subunit I (EC 1.10.3.-)                                                            | <0.0001 | 3.3         |
| GBAA1944  | YP_018588.1            | Cytochrome d ubiquinol oxidase subunit II (EC 1.10.3.-)                                                           | <0.0001 | 3.0         |
| GBAA1945  | YP_018589.1            | Transport ATP-binding protein cydD                                                                                | <0.0001 | 3.0         |
| GBAA1946  | YP_018590.1            | Transport ATP-binding protein cydC                                                                                | <0.0001 | 2.5         |
| GBAA2016  | YP_018663.1            | Luciferase-like monooxygenase (EC 1.14.-.-)                                                                       | <0.0001 | 3.7         |
| GBAA2370  | YP_019014.1            | 2,3-dihydroxybenzoate-AMP ligase (EC 2.7.7.58)                                                                    | 0.0016  | 3.3         |
| GBAA3317  | YP_019951.2            | Amino acid permease                                                                                               | 0.0034  | 4.0         |
| GBAA3429  | YP_020064.1            | Gluconate permease                                                                                                | 0.0068  | 2.3         |
| GBAA3431  | YP_020066.1            | 6-phosphogluconate dehydrogenase (EC 1.1.1.44)                                                                    | 0.0079  | 2.3         |
| GBAA3438  | YP_020073.1            | Quinone oxidoreductase (EC 1.6.5.5)                                                                               | 0.0031  | 2.2         |
| GBAA3439  | YP_022642.1            | Hypothetical protein                                                                                              | 0.0003  | 2.7         |
| GBAA3538  | YP_020172.1            | Hypothetical protein                                                                                              | 0.0006  | 2.8         |
| GBAA3595  | YP_020230.2            | BNR-repeat containing protein                                                                                     | 0.0082  | 2.9         |
| GBAA3631  | YP_052641.1            | Formate dehydrogenase alpha chain (EC 1.2.1.2)                                                                    | <0.0001 | 2.9         |
| GBAA4145  | YP_020792.1            | Hypothetical cytosolic protein                                                                                    | 0.0034  | 2.6         |
| GBAA4146  | YP_020793.1            | Hypothetical cytosolic protein                                                                                    | 0.003   | 2.5         |
| GBAA4595  | YP_021241.1            | Ferrichrome transport ATP-binding protein fhuC                                                                    | 0.0012  | 4.5         |



|          |             |                                                           |         |     |
|----------|-------------|-----------------------------------------------------------|---------|-----|
| GBAA4652 | YP_021299.1 | Ferrichrome-binding protein                               | <0.0001 | 7.9 |
| GBAA4694 | YP_021342.1 | Delta-aminolevulinic acid dehydratase (EC 4.2.1.24)       | 0.0027  | 2.3 |
| GBAA5063 | YP_022716.1 | Hypothetical protein                                      | 0.0048  | 3.6 |
| GBAA5064 | YP_021713.1 | Ferrous iron transport protein B                          | 0.0002  | 4.2 |
| GBAA5281 | YP_021938.1 | Hypothetical cytosolic protein                            | 0.0066  | 3.9 |
| GBAA5301 | YP_021959.1 | Amino acid carrier protein alsT homolog                   | <0.0001 | 5.1 |
| GBAA5328 | YP_021986.1 | Ferric anguibactin transport system permease protein fatC | <0.0001 | 2.8 |
| GBAA5329 | YP_021987.1 | Ferric anguibactin transport system permease protein fatD | 0.0002  | 2.6 |
| GBAA5330 | YP_021988.2 | Ferric anguibactin-binding protein                        | <0.0001 | 3.8 |
| GBAA5616 | YP_022288.1 | Hypothetical protein                                      | 0.0085  | 2.6 |

This table reports genes with a significant difference in expression ( $p < 0.01$ ) between genotypes, as well as increased expression in the  $\Delta$ AtxA mutants strain as compared to the WT strain (fold-change  $> 2$ ).

Supplementary Table 8.

Genes having increased expression in environments of CO<sub>2</sub> (total = 99)

| Locus Tag      | Protein Product (NCBI) | Protein Annotation                                                | P-Value | Fold-Change |
|----------------|------------------------|-------------------------------------------------------------------|---------|-------------|
| GBAA_pXO1_0123 | YP_016454.2            | Hypothetical protein                                              | <0.0001 | 21.3        |
| GBAA_pXO1_0124 | YP_016455.2            | S-layer protein                                                   | 0.0040  | 16.7        |
| GBAA_pXO1_0125 | YP_016456.2            | Phosphatidylglycerophosphatase B (EC 3.1.3.27)                    | 0.0005  | 8.3         |
| GBAA_pXO1_0137 | YP_016468.2            | Hypothetical protein                                              | <0.0001 | 9.9         |
| GBAA_pXO1_0148 | YP_016479.2            | Histidine protein kinase                                          | 0.0071  | 2.2         |
| GBAA_pXO1_0151 | YP_016482.2            | Hypothetical protein                                              | <0.0001 | 46.6        |
| GBAA_pXO1_0152 | YP_016483.2            | Hypothetical protein                                              | <0.0001 | 45.4        |
| GBAA_pXO1_0153 | YP_016484.2            | Hypothetical protein                                              | <0.0001 | 18.1        |
| GBAA_pXO1_0164 | YP_016495.2            | Protective surface antigen                                        | <0.0001 | 47.6        |
| GBAA_pXO1_0165 | YP_016496.2            | Hypothetical protein                                              | <0.0001 | 27.5        |
| GBAA_pXO1_0166 | YP_016497.2            | Transcriptional repressor pagR                                    | <0.0001 | 36.9        |
| GBAA_pXO1_0171 | YP_016502.2            | Ribonuclease domain protein                                       | <0.0001 | 9.8         |
| GBAA_pXO1_0172 | YP_016503.2            | Lethal factor precursor (EC 3.4.24.-)                             | <0.0001 | 8.4         |
| GBAA0141       | YP_016746.1            | Cobalt transport protein cbiQ                                     | 0.0002  | 2.2         |
| GBAA0164       | YP_016771.1            | 6-phosphogluconate dehydrogenase (EC 1.1.1.44)                    | <0.0001 | 2.2         |
| GBAA0239       | YP_016845.1            | Hypothetical Protein                                              | 0.0011  | 2.1         |
| GBAA0366       | YP_016985.1            | Fatty acid desaturase (EC 1.14.99.-)                              | <0.0001 | 2.4         |
| GBAA0406       | YP_017026.1            | Hypothetical cytosolic protein                                    | 0.0004  | 2.4         |
| GBAA0430       | YP_017055.1            | Hypothetical protein                                              | 0.0001  | 2.3         |
| GBAA0495       | YP_017114.1            | Integral membrane protein                                         | 0.0007  | 2.7         |
| GBAA0556       | YP_017178.1            | Hypothetical protein                                              | <0.0001 | 3.8         |
| GBAA0557       | YP_017179.1            | Flotillin                                                         | <0.0001 | 3.6         |
| GBAA0793       | YP_017427.1            | PTS system, diacetylchitobiose-specific IIC component             | <0.0001 | 5.5         |
| GBAA0795       | YP_052611.1            | outer surface protein                                             | <0.0001 | 5.7         |
| GBAA0811       | YP_017449.1            | Hypothetical protein                                              | 0.0062  | 2.2         |
| GBAA0832       | YP_017470.1            | Quaternary ammonium compound-resistance protein                   | <0.0001 | 10.3        |
| GBAA0833       | YP_017471.1            | Quaternary ammonium compound-resistance protein                   | <0.0001 | 7.8         |
| GBAA0958       | YP_017590.1            | Transcriptional regulator, MarR family                            | <0.0001 | 3.1         |
| GBAA0959       | YP_017591.1            | CDP-diacylglycerol--serine O-phosphatidyltransferase (EC 2.7.8.8) | <0.0001 | 2.9         |
| GBAA0960       | YP_017592.1            | ATP synthase protein I                                            | <0.0001 | 2.9         |
| GBAA1178       | YP_017791.1            | Hypothetical protein                                              | 0.008   | 2.3         |
| GBAA1192       | YP_017805.1            | Oligopeptide transport system permease protein oppB               | <0.0001 | 2.4         |
| GBAA1193       | YP_017806.1            | Oligopeptide transport system permease                            | <0.0001 | 2.8         |

|          |             |                                                                                 |         |      |
|----------|-------------|---------------------------------------------------------------------------------|---------|------|
|          |             | protein oppC                                                                    |         |      |
| GBAA1194 | YP_017807.1 | Oligopeptide transport ATP-binding protein oppD                                 | <0.0001 | 2.1  |
| GBAA1195 | YP_017808.1 | Oligopeptide transport ATP-binding protein oppF                                 | <0.0001 | 2.7  |
| GBAA1363 | YP_017982.1 | Hypothetical protein                                                            | 0.0001  | 2.8  |
| GBAA1480 | YP_018102.1 | Hypothetical protein                                                            | <0.0001 | 2.0  |
| GBAA1639 | YP_018274.1 | Na <sup>+</sup> /H <sup>+</sup> antiporter NapA (inosine-dependent germination) | <0.0001 | 16.8 |
| GBAA1815 | YP_018452.1 | Hypothetical protein                                                            | <0.0001 | 2.7  |
| GBAA1822 | YP_018459.1 | Carbon starvation protein A                                                     | <0.0001 | 2.8  |
| GBAA1826 | YP_018464.1 | 3-oxoacyl-[acyl-carrier-protein] synthase III (EC 2.3.1.41)                     | <0.0001 | 2.9  |
| GBAA1892 | YP_018536.1 | Deoxyribose-phosphate aldolase (EC 4.1.2.4)                                     | <0.0001 | 2.6  |
| GBAA1893 | YP_018537.1 | Nucleoside permease nupC                                                        | <0.0001 | 3.2  |
| GBAA1894 | YP_018538.1 | Pyrimidine-nucleoside phosphorylase (EC 2.4.2.2)                                | <0.0001 | 2.5  |
| GBAA1895 | YP_018539.1 | Cytidine deaminase (EC 3.5.4.5)                                                 | <0.0001 | 2.6  |
| GBAA1943 | YP_018587.1 | Cytochrome d ubiquinol oxidase subunit I (EC 1.10.3.-)                          | <0.0001 | 4.5  |
| GBAA1944 | YP_018588.1 | Cytochrome d ubiquinol oxidase subunit II (EC 1.10.3.-)                         | <0.0001 | 3.9  |
| GBAA1945 | YP_018589.1 | Transport ATP-binding protein cydD                                              | <0.0001 | 4.2  |
| GBAA1946 | YP_018590.1 | Transport ATP-binding protein cydC                                              | <0.0001 | 3.3  |
| GBAA1984 | YP_018628.1 | Acyl carrier protein                                                            | <0.0001 | 2.4  |
| GBAA1985 | YP_018629.1 | Hypothetical Protein                                                            | <0.0001 | 3.0  |
| GBAA1986 | YP_018630.1 | Hypothetical cytosolic protein                                                  | <0.0001 | 4.4  |
| GBAA2061 | YP_018702.1 | CBS domain containing protein                                                   | <0.0001 | 2.2  |
| GBAA2539 | YP_019178.1 | phosphoesterase (EC 3.1.-.-)                                                    | <0.0001 | 2.7  |
| GBAA2839 | YP_019482.1 | Hypothetical protein                                                            | <0.0001 | 6.9  |
| GBAA2840 | YP_019483.1 | Transporter                                                                     | <0.0001 | 8.6  |
| GBAA2841 | YP_019484.1 | Hypothetical Protein                                                            | <0.0001 | 2.9  |
| GBAA2918 | YP_019560.1 | Hypothetical protein                                                            | 0.0008  | 2.3  |
| GBAA2996 | YP_019639.1 | PEPTIDASE FAMILY M20                                                            | <0.0001 | 4.7  |
| GBAA3258 | YP_019895.1 | Macrolide-efflux protein                                                        | <0.0001 | 3.6  |
| GBAA3445 | YP_020078.1 | Hypothetical protein                                                            | 0.0002  | 2.2  |
| GBAA3645 | YP_020278.1 | Oligopeptide-binding protein oppA                                               | <0.0001 | 3.0  |
| GBAA3988 | YP_020628.1 | Acyl carrier protein                                                            | 0.0002  | 2.1  |
| GBAA3989 | YP_020629.1 | 3-oxoacyl-[acyl-carrier protein] reductase (EC 1.1.1.100)                       | <0.0001 | 2.2  |
| GBAA4060 | YP_020704.1 | Acetyltransferase (EC 2.3.1.-)                                                  | <0.0001 | 2.8  |
| GBAA4242 | YP_020884.1 | Hypothetical protein                                                            | <0.0001 | 2.9  |
| GBAA4265 | YP_020907.1 | Hypothetical protein                                                            | 0.001   | 2.3  |
| GBAA4266 | YP_020908.1 | Hypothetical protein                                                            | 0.0084  | 2.3  |
| GBAA4337 | YP_020983.1 | Biotin synthesis protein bioC                                                   | 0.0008  | 2.4  |

|          |             |                                                                                                            |         |     |
|----------|-------------|------------------------------------------------------------------------------------------------------------|---------|-----|
| GBAA4339 | YP_020985.1 | 8-amino-7-oxonanoate synthase (EC 2.3.1.47)                                                                | <0.0001 | 3.4 |
| GBAA4340 | YP_020986.1 | Dethiobiotin synthetase (EC 6.3.3.3)                                                                       | 0.0002  | 3.1 |
| GBAA4341 | YP_020987.1 | Adenosylmethionine-8-amino-7-oxonanoate aminotransferase (EC 2.6.1.62)                                     | <0.0001 | 2.9 |
| GBAA4434 | YP_021077.1 | Transcriptional regulator, TetR family                                                                     | <0.0001 | 3.0 |
| GBAA4435 | YP_021078.1 | Quaternary ammonium compound-resistance protein                                                            | <0.0001 | 3.4 |
| GBAA4437 | YP_021080.1 | Hypothetical protein                                                                                       | 0.0039  | 2.5 |
| GBAA4473 | YP_021116.1 | Hypothetical protein                                                                                       | 0.0007  | 2.3 |
| GBAA4490 | YP_021134.1 | LSU ribosomal protein L33P                                                                                 | <0.0001 | 2.3 |
| GBAA4494 | YP_021138.1 | Phosphate transport system permease protein pstA                                                           | 0.0062  | 2.1 |
| GBAA4495 | YP_021139.1 | Phosphate transport system permease protein pstC                                                           | 0.0052  | 2.1 |
| GBAA4514 | YP_021159.1 | Membrane-attached cytochrome c550                                                                          | 0.0069  | 2.3 |
| GBAA4617 | YP_021265.1 | Hypothetical Protein                                                                                       | <0.0001 | 2.3 |
| GBAA4751 | YP_021400.1 | Thioesterase (EC 3.1.2.-)                                                                                  | <0.0001 | 2.3 |
| GBAA4865 | YP_022705.1 | Hypothetical protein                                                                                       | <0.0001 | 5.3 |
| GBAA4875 | YP_021517.1 | Universal stress protein family                                                                            | <0.0001 | 2.8 |
| GBAA4967 | YP_021614.2 | CarD-like transcriptional regulator                                                                        | 0.0004  | 2.2 |
| GBAA5051 | YP_021699.1 | Cytochrome d ubiquinol oxidase subunit II (EC 1.10.3.-)                                                    | 0.0001  | 2.1 |
| GBAA5095 | YP_021745.1 | 2-keto-3-deoxygluconate permease                                                                           | 0.0003  | 2.0 |
| GBAA5097 | YP_021747.1 | 2-dehydro-3-deoxygluconokinase (EC 2.7.1.45)                                                               | 0.0001  | 2.2 |
| GBAA5098 | YP_021748.1 | 4-Hydroxy-2-oxoglutarate aldolase (EC 4.1.3.16) / 2-dehydro-3-deoxyphosphogluconate aldolase (EC 4.1.2.14) | 0.0004  | 2.1 |
| GBAA5179 | YP_021834.1 | Hypothetical cytosolic protein                                                                             | <0.0001 | 2.4 |
| GBAA5237 | YP_021889.1 | Hypothetical lipoprotein                                                                                   | <0.0001 | 2.4 |
| GBAA5239 | YP_021891.1 | regulatory protein (pfoS/R)                                                                                | 0.0024  | 2.2 |
| GBAA5240 | YP_021893.1 | L-lactate dehydrogenase (EC 1.1.1.27)                                                                      | <0.0001 | 2.2 |
| GBAA5286 | YP_021943.1 | Na <sup>+</sup> /H <sup>+</sup> antiporter napA                                                            | 0.0017  | 2.6 |
| GBAA5321 | YP_021979.1 | Hypothetical protein                                                                                       | 0.0062  | 2.3 |
| GBAA5322 | YP_021980.1 | Hypothetical protein                                                                                       | 0.0017  | 3.0 |
| GBAA5422 | YP_022085.1 | Ribosome-associated factor Y                                                                               | <0.0001 | 2.3 |
| GBAA5501 | YP_022168.1 | ABC transporter substrate-binding protein                                                                  | 0.0003  | 2.1 |
| GBAA5605 | YP_022276.1 | Hypothetical protein                                                                                       | 0.0067  | 3.3 |

This table reports genes with a significant difference in expression ( $p < 0.01$ ) between environments, as well as increased expression in CO<sub>2</sub> environments as compared to air (fold-change > 2).

Supplementary Table 9.

Genes having increased expression in environments of air (total = 219)

| Locus Tag      | Protein Product (NCBI) | Protein Annotation                                                      | P-Value | Fold-Change |
|----------------|------------------------|-------------------------------------------------------------------------|---------|-------------|
| GBAA_pXO1_0005 | YP_016336.2            | Hypothetical protein                                                    | <0.0001 | 2.9         |
| GBAA_pXO1_0006 | YP_016337.2            | Hypothetical protein                                                    | 0.0002  | 2.4         |
| GBAA_pXO1_0018 | YP_016349.2            | Hypothetical protein                                                    | 0.0018  | 3.0         |
| GBAA_pXO1_0114 | YP_016445.2            | Hypothetical cytosolic protein                                          | 0.0071  | 2.3         |
| GBAA0232       | YP_016838.2            | Oligopeptide transport system permease protein appB                     | 0.0018  | 4.9         |
| GBAA0325       | YP_016941.1            | 4-aminobutyrate aminotransferase (EC 2.6.1.19)                          | 0.0001  | 4.5         |
| GBAA0364       | YP_016983.1            | Benzoate transport protein                                              | 0.0024  | 3.0         |
| GBAA0381       | YP_017001.1            | Hydroxymethylpyrimidine transport system permease protein               | 0.0022  | 3.8         |
| GBAA0387       | YP_017007.1            | Thioredoxin                                                             | 0.0002  | 3.6         |
| GBAA0412       | YP_017035.1            | Hypothetical Membrane Spanning Protein                                  | 0.007   | 3.2         |
| GBAA0537       | YP_017157.2            | Peroxide operon regulator                                               | <0.0001 | 7.9         |
| GBAA0543       | YP_017165.1            | Monofunctional biosynthetic peptidoglycan transglycosylase (EC 2.4.2.-) | 0.0017  | 3.1         |
| GBAA0571       | YP_017194.1            | Two-component response regulator                                        | <0.0001 | 3.9         |
| GBAA0574       | YP_017197.2            | Hypothetical Protein                                                    | <0.0001 | 10.6        |
| GBAA0587       | YP_017211.1            | Acetyltransferase, GNAT family (EC 2.3.1.-)                             | <0.0001 | 12.6        |
| GBAA0592       | YP_017218.1            | Alanine dehydrogenase (EC 1.4.1.1)                                      | 0.0095  | 2.9         |
| GBAA0631       | YP_017259.1            | PTS system, trehalose-specific IIBC component (EC 2.7.1.69)             | <0.0001 | 88.8        |
| GBAA0675       | YP_017304.1            | (R,R)-butanediol dehydrogenase (EC 1.1.1.4)                             | <0.0001 | 5.5         |
| GBAA0689       | YP_017318.1            | Di-/tripeptide transporter                                              | <0.0001 | 12.3        |
| GBAA0739       | YP_017371.1            | Potassium-transporting ATPase A chain (EC 3.6.3.12)                     | <0.0001 | 15.7        |
| GBAA0740       | YP_017372.1            | Potassium-transporting ATPase B chain (EC 3.6.3.12)                     | <0.0001 | 18.0        |
| GBAA0741       | YP_017373.1            | Potassium-transporting ATPase C chain (EC 3.6.3.12)                     | <0.0001 | 15.2        |
| GBAA0742       | YP_017374.2            | Sensor protein kdpD (EC 2.7.13.3)                                       | <0.0001 | 10.6        |
| GBAA0745       | YP_017377.1            | Phospholipase (EC 3.1.-.-)                                              | <0.0001 | 8.1         |
| GBAA0766       | YP_017399.1            | Nitroreductase family                                                   | 0.0015  | 4.7         |
| GBAA0796       | YP_017431.1            | SH3 domain protein / 3D domain protein                                  | 0.0096  | 4.6         |
| GBAA0797       | YP_017432.2            | ABC transporter permease protein                                        | <0.0001 | 4.9         |
| GBAA0798       | YP_017433.1            | ABC transporter ATP-binding protein                                     | <0.0001 | 6.4         |
| GBAA0799       | YP_017434.1            | HlyD family secretion protein                                           | <0.0001 | 6.7         |
| GBAA0829       | YP_017467.1            | Transporter, Drug/Metabolite Exporter family                            | <0.0001 | 20.2        |

|          |             |                                                                                                        |         |      |
|----------|-------------|--------------------------------------------------------------------------------------------------------|---------|------|
| GBAA0855 | YP_017492.1 | Cystine-binding protein                                                                                | 0.0025  | 3.6  |
| GBAA0856 | YP_017493.2 | Cystine transport system permease protein                                                              | 0.0035  | 3.0  |
| GBAA0866 | YP_017503.2 | Acetolactate synthase (EC 2.2.1.6)                                                                     | <0.0001 | 18.7 |
| GBAA0867 | YP_017504.1 | Alpha-acetolactate decarboxylase (EC 4.1.1.5)                                                          | <0.0001 | 15.5 |
| GBAA0871 | YP_017508.1 | Collagen adhesion protein                                                                              | <0.0001 | 6.4  |
| GBAA1032 | YP_017659.2 | RNA polymerase ECF-type sigma factor                                                                   | <0.0001 | 7.0  |
| GBAA1034 | YP_017661.1 | Rod shape-determining protein rodA                                                                     | <0.0001 | 5.6  |
| GBAA1158 | YP_017774.1 | Ferrochelatase (EC 4.99.1.1)                                                                           | <0.0001 | 48.3 |
| GBAA1159 | YP_017775.1 | Catalase (EC 1.11.1.6)                                                                                 | <0.0001 | 7.8  |
| GBAA1169 | YP_017783.1 | Peptidyl-prolyl cis-trans isomerase (EC 5.2.1.8)                                                       | <0.0001 | 7.4  |
| GBAA1174 | YP_017788.1 | Hydrolase (HAD superfamily)                                                                            | 0.007   | 2.9  |
| GBAA1208 | YP_017819.1 | Hypothetical cytosolic protein                                                                         | 0.0072  | 2.7  |
| GBAA1209 | YP_017820.1 | Globin family protein                                                                                  | 0.001   | 3.4  |
| GBAA1287 | YP_017902.1 | Signal peptidase I (EC 3.4.21.89)                                                                      | <0.0001 | 12.4 |
| GBAA1288 | YP_017903.1 | Hypothetical protein                                                                                   | <0.0001 | 8    |
| GBAA1308 | YP_017922.1 | (S)-2-hydroxy-acid oxidase subunit GlcF (EC 1.1.3.15)                                                  | 0.0005  | 3.8  |
| GBAA1309 | YP_017923.1 | (S)-2-hydroxy-acid oxidase chain D (EC 1.1.3.15)                                                       | 0.0001  | 4.2  |
| GBAA1348 | YP_017969.1 | CBS domain containing protein                                                                          | 0.003   | 3.0  |
| GBAA1467 | YP_018089.1 | Flavoheomprotein / Dihydropteridine reductase (EC 1.5.1.34) / Nitric oxide dioxygenase (EC 1.14.12.17) | <0.0001 | 3.8  |
| GBAA1497 | YP_018120.1 | Transcriptional regulatory protein resD                                                                | 0.0038  | 2.8  |
| GBAA1605 | YP_018228.1 | similar to N-terminus of Mg(2+) P-type ATPase                                                          | 0.0038  | 2.9  |
| GBAA1636 | YP_018271.2 | Adenosylmethionine-8-amino-7-oxononanoate aminotransferase (EC 2.6.1.62)                               | 0.0013  | 3.1  |
| GBAA1751 | YP_018392.1 | Asparagine synthetase [glutamine-hydrolyzing] (EC 6.3.5.4)                                             | <0.0001 | 13.1 |
| GBAA1754 | YP_018394.1 | ECF-type sigma factor negative effector                                                                | 0.0063  | 2.8  |
| GBAA1756 | YP_018396.1 | Cobalt-zinc-cadmium resistance protein czcD                                                            | 0.0002  | 3.4  |
| GBAA1767 | YP_018408.1 | Aldose 1-dehydrogenase (EC 1.1.1.121) / Fumarate hydratase class II (EC 4.2.1.2)                       | 0.0089  | 2.7  |
| GBAA1774 | YP_018413.1 | Peptidase E (EC 3.4.11.2)                                                                              | <0.0001 | 5.8  |
| GBAA1785 | YP_018424.2 | Hypothetical Membrane Spanning Protein                                                                 | 0.0097  | 2.6  |
| GBAA1793 | YP_018431.1 | Export ABC transporter ATP-binding protein                                                             | <0.0001 | 6.8  |
| GBAA1794 | YP_018432.1 | Export ABC transporter permease protein                                                                | <0.0001 | 5.9  |
| GBAA1795 | YP_018433.1 | Export ABC transporter permease protein                                                                | <0.0001 | 4.3  |
| GBAA1796 | YP_018434.1 | Cardiolipin synthetase (EC 2.7.8.-)                                                                    | <0.0001 | 3.9  |
| GBAA1799 | YP_018436.1 | Proton/sodium-glutamate symport protein                                                                | <0.0001 | 12.8 |
| GBAA1800 | YP_018437.1 | Aspartate ammonia-lyase (EC 4.3.1.1)                                                                   | <0.0001 | 7.3  |

|          |             |                                                                                                   |         |      |
|----------|-------------|---------------------------------------------------------------------------------------------------|---------|------|
| GBAA1801 | YP_018438.1 | NAD-dependent malic enzyme (EC 1.1.1.38)                                                          | 0.0002  | 3.3  |
| GBAA1862 | YP_018502.1 | Succinyl-CoA:coenzyme A transferase (EC 2.8.3.-)                                                  | <0.0001 | 35.8 |
| GBAA1863 | YP_018503.1 | Acetyltransferase (EC 2.3.1.-)                                                                    | 0.002   | 3.4  |
| GBAA1864 | YP_018504.1 | Hypothetical protein                                                                              | 0.0077  | 3.7  |
| GBAA1875 | YP_018516.1 | Radical SAM superfamily protein                                                                   | <0.0001 | 8.4  |
| GBAA1880 | YP_018522.1 | Manganese transport protein mntH                                                                  | 0.0046  | 4.9  |
| GBAA1968 | YP_018612.1 | Homoserine dehydrogenase (EC 1.1.1.3)                                                             | 0.0064  | 2.8  |
| GBAA1973 | YP_018617.1 | Transcriptional regulator, LytR family                                                            | 0.0058  | 3.8  |
| GBAA1974 | YP_018618.1 | Hypothetical protein                                                                              | <0.0001 | 4.3  |
| GBAA1975 | YP_018619.1 | Alkaline phosphatase synthesis two-component response regulator phoP                              | <0.0001 | 5.1  |
| GBAA1980 | YP_018624.2 | Acetyltransferase (EC 2.3.1.-)                                                                    | <0.0001 | 3.7  |
| GBAA1981 | YP_018625.1 | Amino-acid citrate synthetase (EC 6.-.-)                                                          | <0.0001 | 3.6  |
| GBAA2051 | YP_018690.1 | Hypothetical membrane spanning protein                                                            | <0.0001 | 5.0  |
| GBAA2052 | YP_018691.1 | Hypothetical membrane spanning protein                                                            | <0.0001 | 3.8  |
| GBAA2069 | YP_018710.2 | Acetyltransferase, GNAT family (EC 2.3.1.-)                                                       | 0.0002  | 3.7  |
| GBAA2070 | YP_018711.1 | D-alanyl-D-alanine metallocoarboxypeptidase (EC 3.4.17.14)                                        | <0.0001 | 3.9  |
| GBAA2071 | YP_018712.1 | Phosphohydrolase (MutT/nudix family protein)                                                      | 0.0001  | 3.5  |
| GBAA2125 | YP_018768.1 | Respiratory nitrate reductase alpha chain (EC 1.7.99.4)                                           | <0.0001 | 9.0  |
| GBAA2126 | YP_018769.1 | Respiratory nitrate reductase beta chain (EC 1.7.99.4)                                            | <0.0001 | 9.6  |
| GBAA2127 | YP_018770.1 | Respiratory nitrate reductase delta chain (EC 1.7.99.4)                                           | <0.0001 | 8.8  |
| GBAA2128 | YP_018771.1 | Respiratory nitrate reductase gamma chain (EC 1.7.99.4)                                           | 0.0005  | 8.9  |
| GBAA2133 | YP_018776.2 | Molybdenum cofactor biosynthesis protein A                                                        | <0.0001 | 12.7 |
| GBAA2134 | YP_018777.1 | Molybdopterin biosynthesis MoeB protein                                                           | <0.0001 | 9.6  |
| GBAA2135 | YP_018778.1 | Molybdopterin biosynthesis MoeA protein                                                           | <0.0001 | 7.7  |
| GBAA2136 | YP_018779.1 | Molybdopterin converting factor, large subunit                                                    | <0.0001 | 9.7  |
| GBAA2137 | YP_018780.1 | Molybdopterin converting factor, small subunit                                                    | <0.0001 | 12.3 |
| GBAA2138 | YP_018781.1 | Nitrite extrusion protein                                                                         | <0.0001 | 7.9  |
| GBAA2143 | YP_018786.1 | Sirohydrochlorin cobaltochelataase (EC 4.99.1.3)                                                  | 0.0033  | 2.8  |
| GBAA2144 | YP_018787.1 | Uroporphyrin-III C-methyltransferase (EC 2.1.1.107) / Uroporphyrinogen-III synthase (EC 4.2.1.75) | 0.0041  | 2.8  |
| GBAA2145 | YP_018788.1 | Nitrite reductase [NAD(P)H] small subunit (EC 1.7.1.4)                                            | 0.0052  | 2.6  |
| GBAA2147 | YP_018790.1 | Nitric oxide-dependent regulator DnrN                                                             | <0.0001 | 4.0  |
| GBAA2255 | YP_018900.1 | Fe <sup>3+</sup> -siderophore binding protein                                                     | <0.0001 | 15.4 |

|          |             |                                                                                                      |         |      |
|----------|-------------|------------------------------------------------------------------------------------------------------|---------|------|
| GBAA2261 | YP_018906.1 | Phosphohydrolase (MutT/nudix family protein)                                                         | <0.0001 | 5.6  |
| GBAA2279 | YP_018929.1 | Glycine betaine transport ATP-binding protein                                                        | <0.0001 | 5.5  |
| GBAA2280 | YP_018930.1 | Glycine betaine transport system permease protein / Glycine betaine-binding protein                  | 0.0004  | 3.4  |
| GBAA2289 | YP_018938.1 | Succinate-semialdehyde dehydrogenase [NADP+] (EC 1.2.1.16)                                           | <0.0001 | 4.0  |
| GBAA2317 | YP_018965.1 | 5-methylcytosine-specific restriction enzyme MRR (EC 3.1.21.-)                                       | 0.0035  | 2.9  |
| GBAA2366 | YP_019010.1 | Hypothetical protein                                                                                 | <0.0001 | 63.5 |
| GBAA2367 | YP_019011.1 | Oxalate/formate antiporter                                                                           | <0.0001 | 18.1 |
| GBAA2388 | YP_019030.1 | Threonyl-tRNA synthetase (EC 6.1.1.3)                                                                | <0.0001 | 4.8  |
| GBAA2390 | YP_019033.1 | ABC transporter permease protein                                                                     | 0.0069  | 8.5  |
| GBAA2393 | YP_019035.2 | Macrolide-efflux protein                                                                             | <0.0001 | 6.3  |
| GBAA2443 | YP_019084.1 | Multidrug resistance ABC transporter ATP-binding and permease protein                                | 0.0003  | 3.4  |
| GBAA2444 | YP_019085.1 | Multidrug/protein/lipid ABC transporter family, ATP-binding and permease protein                     | <0.0001 | 3.8  |
| GBAA2564 | YP_019202.2 | 5'-methylthioadenosine nucleosidase (EC 3.2.2.16) / S-adenosylhomocysteine nucleosidase (EC 3.2.2.9) | <0.0001 | 3.8  |
| GBAA2565 | YP_019203.1 | Putative NAD-dependent dehydrogenase                                                                 | 0.0009  | 3.2  |
| GBAA2569 | YP_019208.1 | hypothetical protein                                                                                 | 0.0038  | 3.2  |
| GBAA2619 | YP_022616.1 | Hypothetical protein                                                                                 | <0.0001 | 6.3  |
| GBAA2620 | YP_019261.1 | Hypothetical protein                                                                                 | <0.0001 | 4.0  |
| GBAA2707 | YP_019348.1 | Acetyltransferase (EC 2.3.1.-)                                                                       | 0.0033  | 2.9  |
| GBAA2783 | YP_019425.2 | Hypothetical protein                                                                                 | 0.0089  | 3.1  |
| GBAA2803 | YP_019445.1 | S-layer homology domain / Metallo-beta-lactamase superfamily                                         | <0.0001 | 5.5  |
| GBAA2809 | YP_019450.1 | Hypothetical Membrane Spanning Protein                                                               | 0.001   | 3.3  |
| GBAA2868 | YP_019512.1 | N-acetylglucosaminyl diphosphoundecaprenol N-acetyl-beta-D-mannosaminyltransferase (EC 2.4.1.187)    | 0.0069  | 2.8  |
| GBAA2889 | YP_019532.1 | Hypothetical protein                                                                                 | 0.0061  | 2.8  |
| GBAA2947 | YP_019588.1 | Sulfatase family protein                                                                             | <0.0001 | 9.8  |
| GBAA2966 | YP_019608.1 | Putative kinase                                                                                      | 0.0098  | 4.1  |
| GBAA2990 | YP_019633.1 | Hypothetical protein                                                                                 | 0.0022  | 3.1  |
| GBAA3010 | YP_019654.1 | Acetyltransferase, GNAT family (EC 2.3.1.-)                                                          | 0.0002  | 3.5  |
| GBAA3020 | YP_052630.1 | Proline/betaine transporter                                                                          | <0.0001 | 18.0 |
| GBAA3076 | YP_019717.1 | Lysine-specific permease                                                                             | <0.0001 | 5.5  |
| GBAA3077 | YP_019718.2 | HesB-like protein                                                                                    | 0.0001  | 4.1  |
| GBAA3078 | YP_019719.1 | Hypothetical protein                                                                                 | 0.0002  | 3.6  |
| GBAA3100 | YP_019742.1 | Copper homeostasis protein cutC                                                                      | 0.0056  | 4.7  |
| GBAA3137 | YP_019776.1 | L-asparaginase (EC 3.5.1.1)                                                                          | 0.004   | 2.8  |



|          |             |                                                                           |         |      |
|----------|-------------|---------------------------------------------------------------------------|---------|------|
| GBAA3140 | YP_019779.1 | UvrC-like protein                                                         | 0.0033  | 4.4  |
| GBAA3141 | YP_019780.2 | Amino acid permease                                                       | <0.0001 | 4.5  |
| GBAA3142 | YP_019781.1 | Branched chain amino acid transport system II carrier protein             | <0.0001 | 4.4  |
| GBAA3143 | YP_019782.1 | Pyrroline-5-carboxylate reductase (EC 1.5.1.2)                            | 0.0095  | 3.8  |
| GBAA3144 | YP_019783.1 | Hypothetical protein                                                      | 0.0021  | 4.6  |
| GBAA3145 | YP_019784.1 | NAD-dependent malic enzyme (EC 1.1.1.38)                                  | <0.0001 | 5.4  |
| GBAA3146 | YP_022631.1 | Hypothetical protein                                                      | 0.0002  | 6.5  |
| GBAA3147 | YP_019785.1 | Hypothetical protein                                                      | 0.0031  | 5.7  |
| GBAA3164 | YP_019804.1 | Catalase (EC 1.11.1.6)                                                    | <0.0001 | 4.2  |
| GBAA3165 | YP_019805.1 | Arylesterase (EC 3.1.1.2)                                                 | <0.0001 | 3.7  |
| GBAA3167 | YP_019807.1 | Hydrolase, isochorismatase family                                         | 0.0005  | 3.5  |
| GBAA3168 | YP_019808.1 | hypothetical protein                                                      | 0.0028  | 3.4  |
| GBAA3180 | YP_019820.1 | Deoxyribodipyrimidine photolyase (EC 4.1.99.3)                            | 0.0012  | 3.5  |
| GBAA3182 | YP_019823.1 | hypothetical protein                                                      | 0.002   | 4.1  |
| GBAA3227 | YP_019866.1 | Hypothetical Protein                                                      | <0.0001 | 26.8 |
| GBAA3228 | YP_019867.1 | Hypothetical cytosolic protein                                            | 0.0013  | 20.4 |
| GBAA3253 | YP_019890.1 | Hypothetical protein                                                      | 0.0021  | 10.6 |
| GBAA3254 | YP_019891.1 | Surface protein                                                           | <0.0001 | 3.5  |
| GBAA3255 | YP_019892.1 | ABC transporter ATP-binding protein                                       | <0.0001 | 4.5  |
| GBAA3256 | YP_019893.1 | ABC transporter permease protein                                          | <0.0001 | 5.6  |
| GBAA3275 | YP_019910.2 | Muramoyltetrapeptide carboxypeptidase (EC 3.4.17.13)                      | 0.0002  | 3.5  |
| GBAA3317 | YP_019951.2 | Amino acid permease                                                       | <0.0001 | 6.9  |
| GBAA3323 | YP_019957.1 | Sigma-M negative effector                                                 | 0.0001  | 4.1  |
| GBAA3324 | YP_019958.1 | RNA polymerase sigma factor sigM                                          | <0.0001 | 4.9  |
| GBAA3338 | YP_019972.1 | S-layer protein                                                           | 0.0057  | 2.8  |
| GBAA3368 | YP_020001.1 | S-adenosylmethionine:2-demethylmenaquinone methyltransferase (EC 2.1.-.-) | 0.0017  | 3.1  |
| GBAA3473 | YP_020108.1 | Long-chain-fatty-acid--CoA ligase (EC 6.2.1.3)                            | <0.0001 | 15.4 |
| GBAA3497 | YP_020132.1 | Hydroxylamine reductase (EC 1.7.99.1)                                     | <0.0001 | 7.8  |
| GBAA3498 | YP_020133.1 | Hypothetical protein                                                      | 0.0031  | 3.1  |
| GBAA3524 | YP_020159.1 | GlcNAc-PI de-N-acetylase family protein                                   | 0.0033  | 2.9  |
| GBAA3538 | YP_020172.1 | Hypothetical protein                                                      | <0.0001 | 5.4  |
| GBAA3554 | YP_020187.1 | Beta-lactamase family protein                                             | <0.0001 | 6.5  |
| GBAA3595 | YP_020230.2 | BNR-repeat containing protein                                             | <0.0001 | 6.1  |
| GBAA3603 | YP_020238.2 | Acetyltransferase (EC 2.3.1.-)                                            | <0.0001 | 5.3  |
| GBAA3609 | YP_020244.1 | Aldehyde dehydrogenase (EC 1.2.1.3)                                       | 0.0052  | 5.3  |
| GBAA3628 | YP_020261.2 | Formate dehydrogenase accessory protein FdhD                              | 0.0005  | 3.2  |

|          |             |                                                                 |         |      |
|----------|-------------|-----------------------------------------------------------------|---------|------|
| GBAA3647 | YP_020281.1 | Transcriptional regulator, LytR family                          | <0.0001 | 31.2 |
| GBAA3648 | YP_020282.1 | ECF-type sigma factor negative effector                         | <0.0001 | 33.5 |
| GBAA3649 | YP_020283.1 | RNA polymerase ECF-type sigma factor                            | <0.0001 | 33.9 |
| GBAA3730 | YP_020367.1 | Murein hydrolase exporter                                       | 0.0004  | 5.5  |
| GBAA3731 | YP_020368.1 | Murein hydrolase export regulator                               | <0.0001 | 5.1  |
| GBAA3739 | YP_020377.2 | Hypothetical protein                                            | 0.0033  | 3.0  |
| GBAA3852 | YP_020489.1 | Hypothetical protein                                            | <0.0001 | 6.9  |
| GBAA3866 | YP_020504.1 | Fe <sup>3+</sup> -siderophore transport system permease protein | 0.0021  | 5.1  |
| GBAA3896 | YP_020534.1 | Tettrapeptide repeat family protein                             | <0.0001 | 7.6  |
| GBAA3995 | YP_020635.1 | General stress protein, Gls24 family                            | 0.0077  | 2.6  |
| GBAA4189 | YP_020833.1 | Putative transcriptional regulator                              | <0.0001 | 3.7  |
| GBAA4205 | YP_020849.2 | phosphoesterase (EC 3.1.-.-)                                    | 0.0098  | 2.8  |
| GBAA4249 | YP_020891.2 | D-beta-hydroxybutyrate dehydrogenase (EC 1.1.1.30)              | 0.0031  | 2.9  |
| GBAA4295 | YP_020938.1 | Anti-sigma F factor                                             | 0.0045  | 2.8  |
| GBAA4369 | YP_021013.1 | Ribosomal-protein-S5-alanine acetyltransferase (EC 2.3.1.128)   | 0.0017  | 2.8  |
| GBAA4499 | YP_021143.1 | Superoxide dismutase (EC 1.15.1.1)                              | 0.0005  | 4.5  |
| GBAA4569 | YP_021214.1 | Hypothetical cytosolic protein                                  | 0.0017  | 3.5  |
| GBAA4595 | YP_021241.1 | Ferrichrome transport ATP-binding protein fhuC                  | 0.0001  | 6.1  |
| GBAA4596 | YP_021242.1 | Ferrichrome transport system permease protein fhuB              | <0.0001 | 11.2 |
| GBAA4597 | YP_021243.1 | Ferrichrome-binding protein                                     | <0.0001 | 17.1 |
| GBAA4652 | YP_021299.1 | Ferrichrome-binding protein                                     | <0.0001 | 15.0 |
| GBAA4666 | YP_021313.1 | Prephenate dehydratase (EC 4.2.1.51)                            | 0.0069  | 2.6  |
| GBAA4667 | YP_021314.1 | ABC transporter permease protein                                | <0.0001 | 6.4  |
| GBAA4668 | YP_021315.1 | ABC transporter permease protein                                | <0.0001 | 31.1 |
| GBAA4669 | YP_021316.1 | ABC transporter ATP-binding protein                             | <0.0001 | 26.2 |
| GBAA4781 | YP_021427.1 | Na(+)/H(+) antiporter                                           | <0.0001 | 5.6  |
| GBAA4789 | YP_021436.1 | Cell surface protein                                            | <0.0001 | 42.9 |
| GBAA4807 | YP_021452.1 | Metal dependent phosphohydrolase                                | <0.0001 | 4.5  |
| GBAA4808 | YP_021453.1 | CAAX amino terminal protease family                             | 0.0006  | 6.5  |
| GBAA4812 | YP_021457.1 | Multidrug resistance protein B                                  | <0.0001 | 39.7 |
| GBAA4813 | YP_021459.1 | Multidrug resistance protein A                                  | <0.0001 | 50.8 |
| GBAA5061 | YP_021711.1 | Phage shock protein A                                           | 0.0095  | 3.6  |
| GBAA5062 | YP_021712.1 | Hypothetical protein                                            | 0.0003  | 3.9  |
| GBAA5063 | YP_022716.1 | Hypothetical protein                                            | <0.0001 | 11.1 |
| GBAA5064 | YP_021713.1 | Ferrous iron transport protein B                                | <0.0001 | 20.8 |
| GBAA5065 | YP_021714.1 | Ferrous iron transport protein A                                | <0.0001 | 35.7 |
| GBAA5066 | YP_021715.1 | Thiamine transporter                                            | 0.0038  | 3.0  |
| GBAA5084 | YP_021732.1 | ABC transporter permease protein                                | <0.0001 | 4.2  |
| GBAA5085 | YP_021733.1 | ABC transporter ATP-binding protein                             | <0.0001 | 5.4  |

|          |             |                                                                                                                   |         |      |
|----------|-------------|-------------------------------------------------------------------------------------------------------------------|---------|------|
| GBAA5256 | YP_052653.1 | Methyl-accepting chemotaxis protein                                                                               | 0.0012  | 2.7  |
| GBAA5262 | YP_021918.1 | Hypothetical exported repetitive protein                                                                          | <0.0001 | 15.8 |
| GBAA5279 | YP_021936.1 | SAM-dependent methyltransferase                                                                                   | 0.002   | 3.3  |
| GBAA5290 | YP_021946.1 | Non-specific DNA-binding protein Dps / Iron-binding ferritin-like antioxidant protein / Ferroxidase (EC 1.16.3.1) | 0.0014  | 2.9  |
| GBAA5298 | YP_021956.1 | Nucleoside permease nupC                                                                                          | 0.0014  | 3.0  |
| GBAA5330 | YP_021988.2 | Ferric anguibactin-binding protein                                                                                | 0.0006  | 3.0  |
| GBAA5405 | YP_022068.2 | Hypothetical membrane spanning protein                                                                            | <0.0001 | 21.0 |
| GBAA5427 | YP_022089.2 | NlpC/P60 family protein                                                                                           | 0.0001  | 3.2  |
| GBAA5443 | YP_022106.1 | PTS system, cellobiose-specific IIC component (EC 2.7.1.69)                                                       | 0.0002  | 3.8  |
| GBAA5481 | YP_022147.1 | SH3 domain protein / 3D domain protein                                                                            | 0.0028  | 3.9  |
| GBAA5620 | YP_022292.1 | Transporter, MFS superfamily                                                                                      | 0.0004  | 3.8  |
| GBAA5630 | YP_022304.1 | Ferrichrome transport system permease protein fhuG                                                                | 0.0049  | 3.1  |
| GBAA5636 | YP_022311.1 | Phosphate acetyltransferase (EC 2.3.1.8)                                                                          | 0.0007  | 3.1  |
| GBAA5689 | YP_022370.1 | Murein hydrolase export regulator                                                                                 | <0.0001 | 29.8 |
| GBAA5690 | YP_022372.1 | Murein hydrolase exporter                                                                                         | 0.0035  | 57.2 |

This table reports genes with a significant difference in expression ( $p < 0.01$ ) between environments, as well as increased expression in air environments as compared to CO<sub>2</sub> (fold-change > 2).

Supplementary Figure 1.

Representative growth curves of wildtype and  $\Delta$ AtxA strains in air and CO<sub>2</sub>

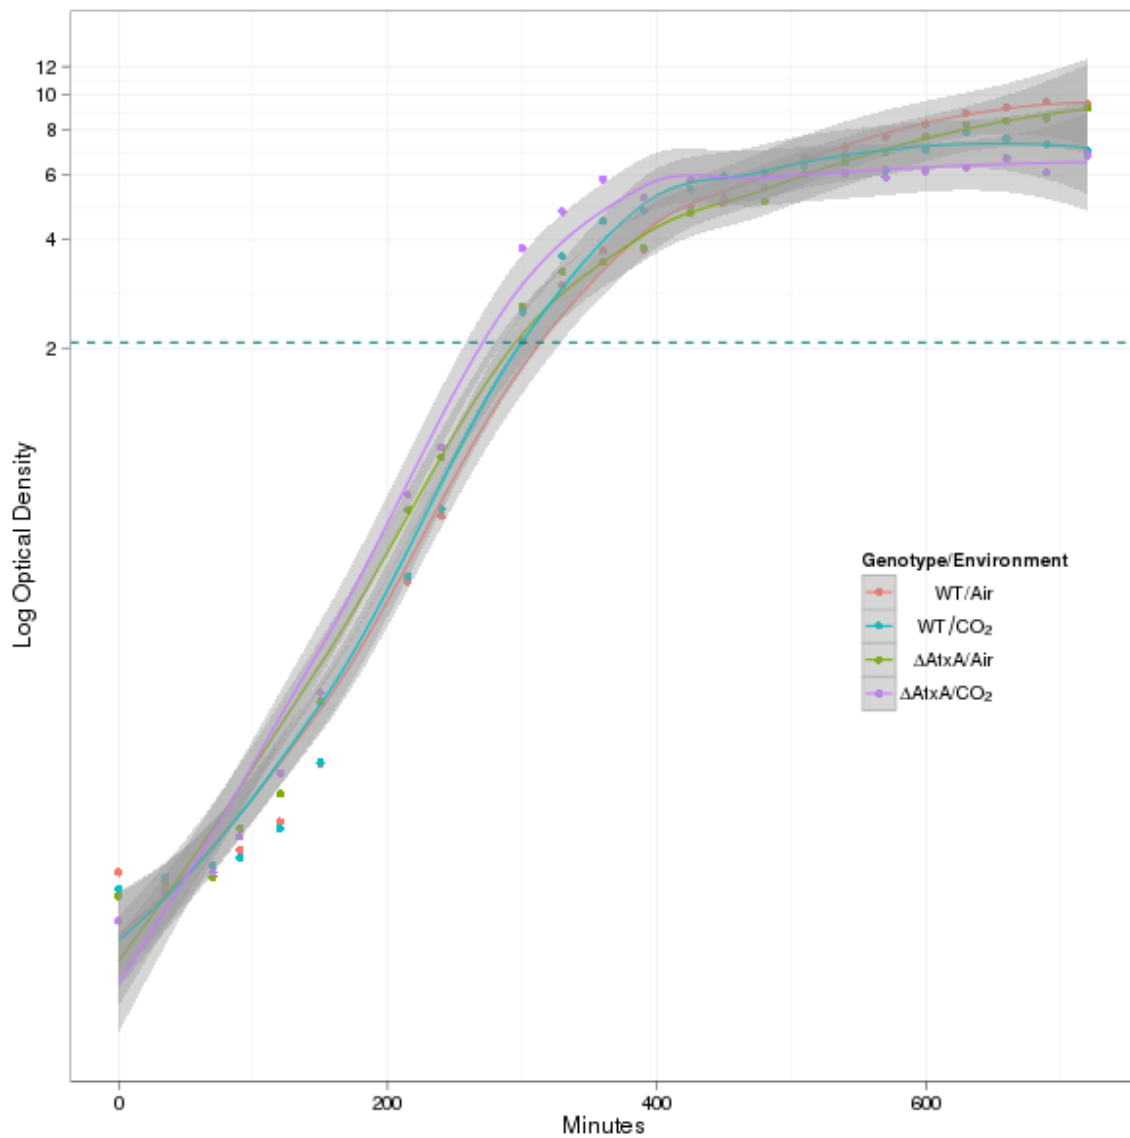

Growth curves for strains cultured in NBY media, where environments of CO<sub>2</sub> denote the addition of 15% CO<sub>2</sub> and 0.8% HCO<sub>3</sub><sup>-</sup>. OD<sub>600nm</sub> readings are transformed to a log base-10 scale. The data points for each curve are fit with a locally weighted scatterplot smoothing regression model, and the grey areas represent 95% confidence intervals. The dotted teal line indicates the mean OD<sub>600nm</sub> at which we harvested our samples. This plot was made using the R package ggplot2.

Supplementary Figure 2: Comparison of RNA-seq to qPCR expression data of seven genes from each condition.

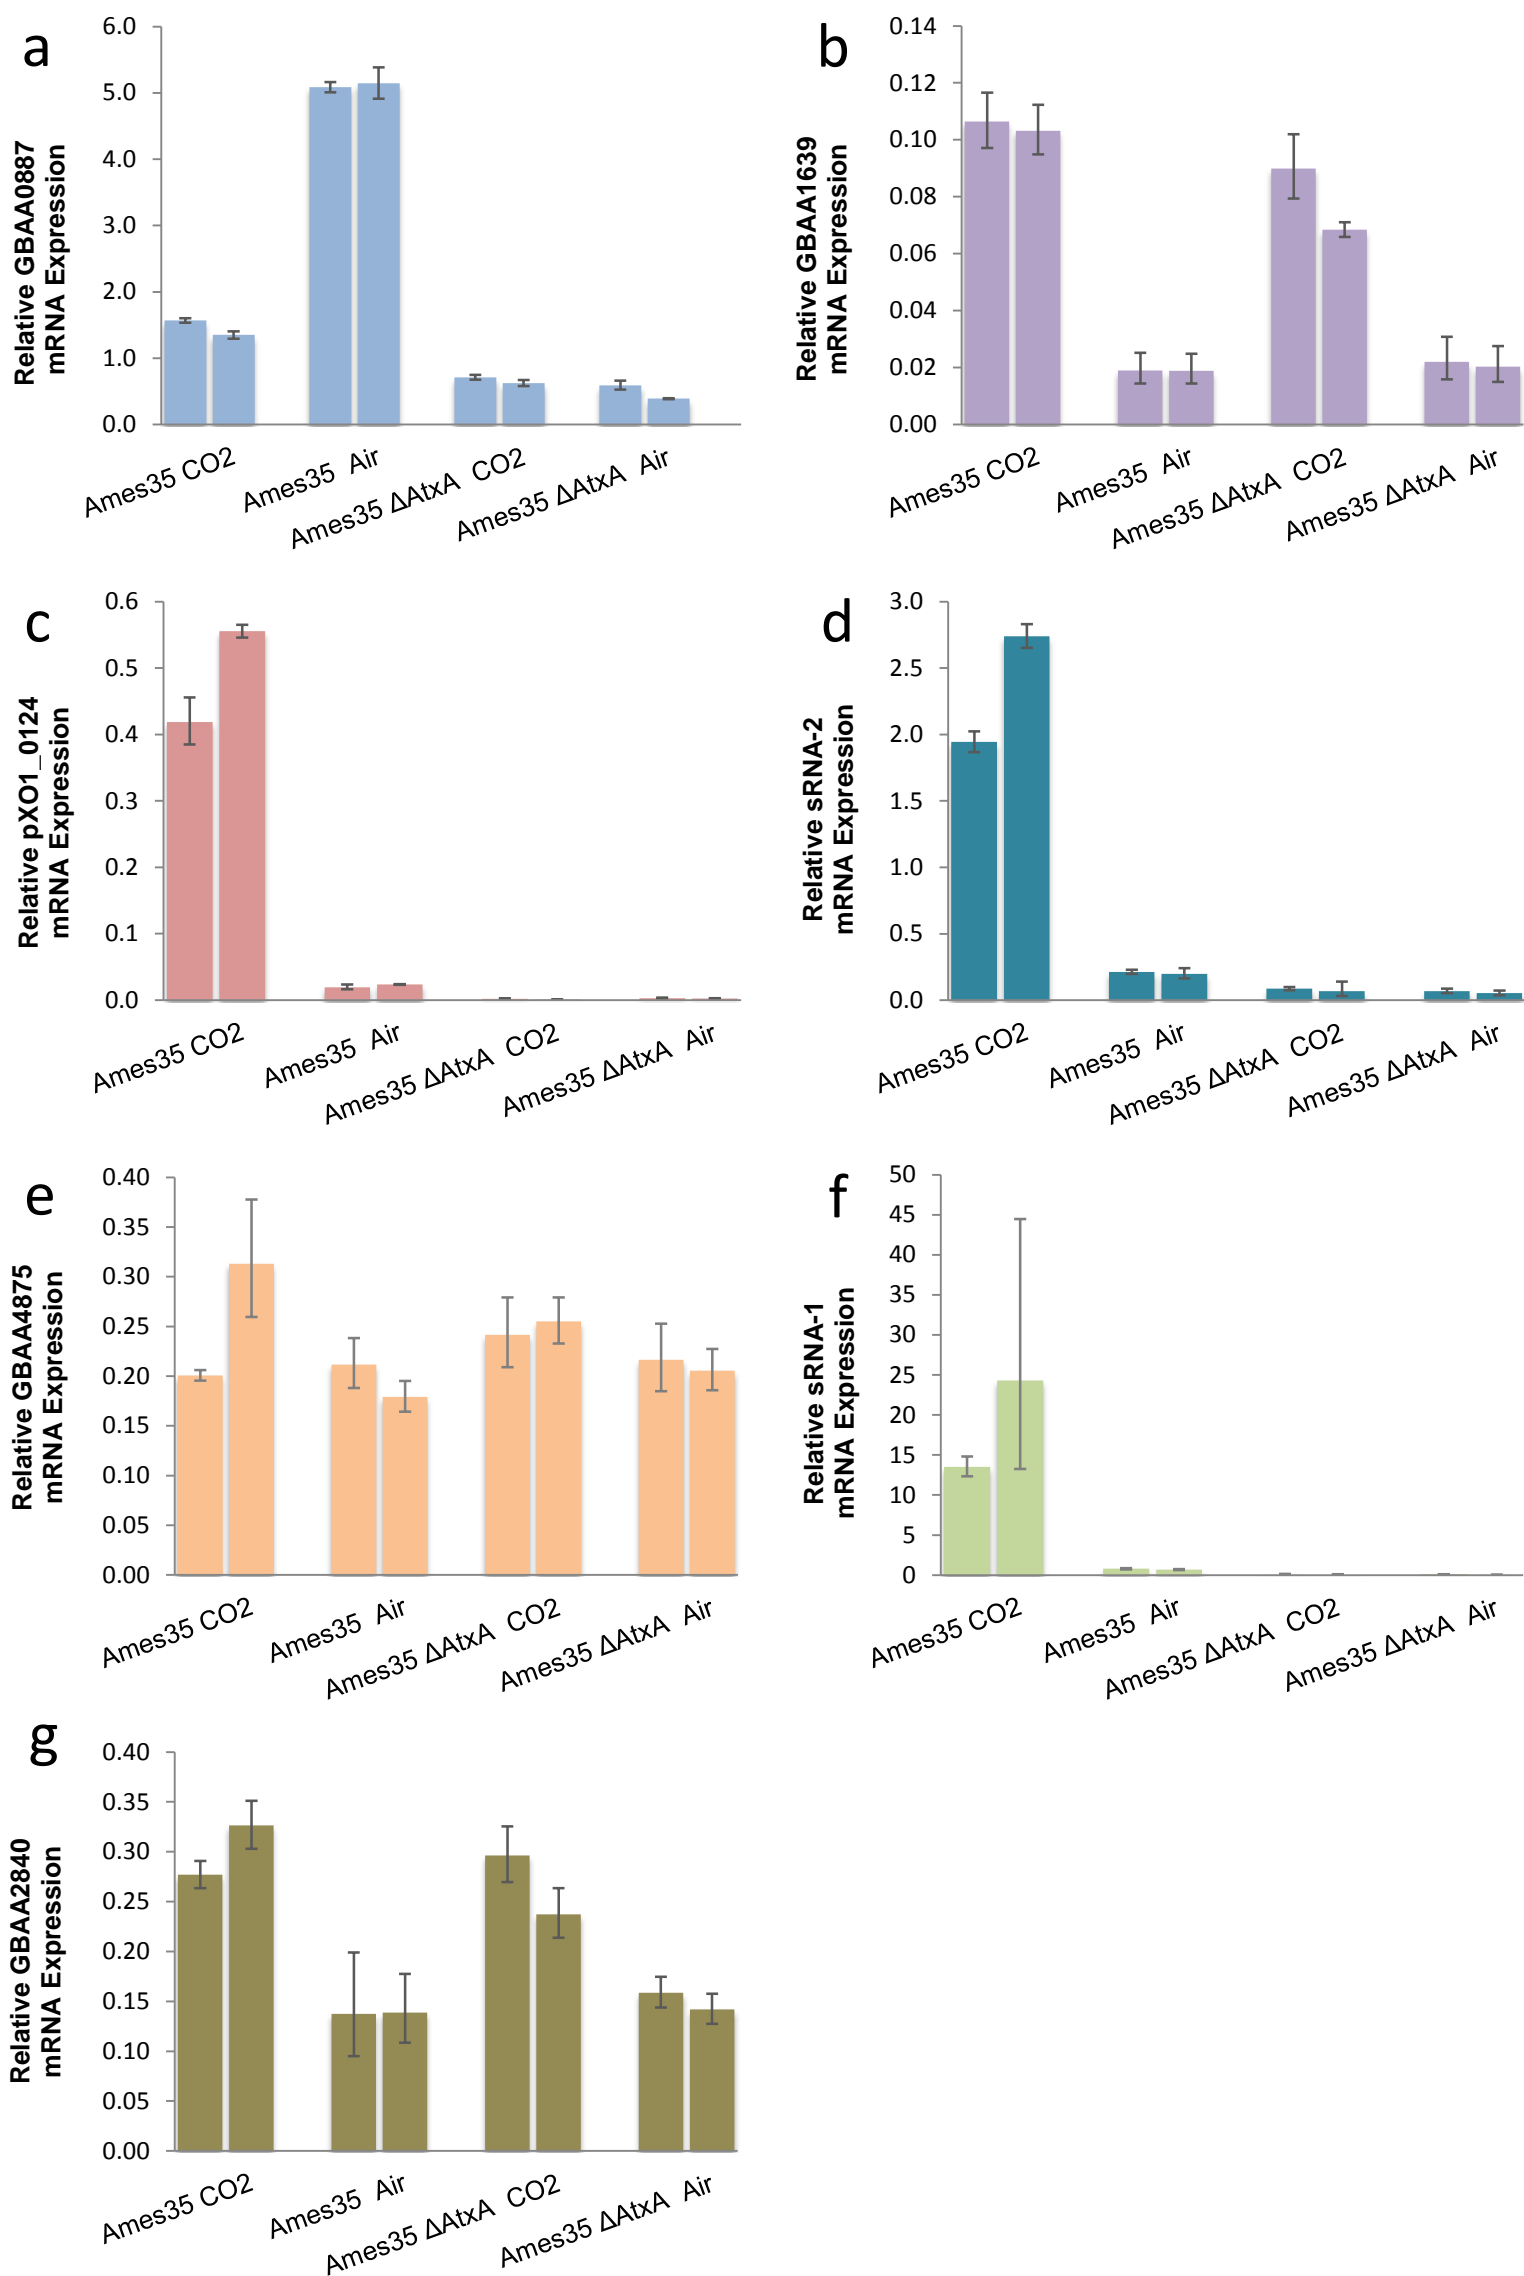

Expression levels for each genes from both sequencing modalities were normalized to the expression of GBAA3936, which codes for the house keeping protein aspartokinase. Genes are labeled by their locus tags (NCBI), except for sRNA-1 and sRNA-2, which are unannotated. The x-axis refers to the condition (of four) in which the RNA-seq and qPCR expression levels were assayed.
